# Supplementary material for: Landslide Segmentation with Deep Learning: Evaluating Model Generalization in Rainfall-Induced Landslides in Brazil
Source: MDPI journal article supplement (doi:10.3390/rs14092237), 2022-05-06
Supplement: s1 [file s1]

**Supplementary Material Table S1 - Post-Processing Operation Results**

| Test Area | operation                                                          | recall | precision | f1-score | iou  |
|-----------|--------------------------------------------------------------------|--------|-----------|----------|------|
| 1         | opening                                                            | 0.48   | 0.56      | 0.52     | 0.35 |
| 1         | closing                                                            | 0.47   | 0.57      | 0.52     | 0.35 |
| 1         | erosion                                                            | 0.55   | 0.46      | 0.50     | 0.33 |
| 1         | dilation                                                           | 0.40   | 0.65      | 0.50     | 0.33 |
| 1         | binary_opening + binary_closing                                    | 0.48   | 0.56      | 0.52     | 0.35 |
| 1         | binary_opening + binary_erosion                                    | 0.55   | 0.46      | 0.50     | 0.33 |
| 1         | binary_opening + binary_dilation                                   | 0.42   | 0.64      | 0.50     | 0.34 |
| 1         | binary_closing + binary_opening                                    | 0.48   | 0.56      | 0.52     | 0.35 |
| 1         | binary_closing + binary_erosion                                    | 0.55   | 0.46      | 0.50     | 0.33 |
| 1         | binary_closing + binary_dilation                                   | 0.40   | 0.65      | 0.50     | 0.33 |
| 1         | binary_erosion + binary_opening                                    | 0.56   | 0.44      | 0.50     | 0.33 |
| 1         | binary_erosion + binary_closing                                    | 0.55   | 0.46      | 0.50     | 0.33 |
| 1         | binary_erosion + binary_dilation                                   | 0.48   | 0.56      | 0.52     | 0.35 |
| 1         | binary_dilation + binary_opening                                   | 0.56   | 0.44      | 0.50     | 0.33 |
| 1         | binary_dilation + binary_closing                                   | 0.55   | 0.46      | 0.50     | 0.33 |
| 1         | binary_dilation + binary_erosion                                   | 0.48   | 0.56      | 0.52     | 0.35 |
| 1         | binary_opening + binary_closing + binary_dilation                  | 0.55   | 0.46      | 0.50     | 0.33 |
| 1         | binary_closing + binary_dilation + binary_erosion                  | 0.48   | 0.56      | 0.52     | 0.35 |
| 1         | binary_dilation + binary_erosion + binary_opening                  | 0.48   | 0.56      | 0.52     | 0.35 |
| 1         | binary_erosion + binary_opening + binary_closing                   | 0.40   | 0.65      | 0.50     | 0.33 |
| 1         | binary_opening + binary_closing + binary_erosion + binary_dilation | 0.48   | 0.56      | 0.52     | 0.35 |
| 1         | binary_closing + binary_erosion + binary_dilation + binary_opening | 0.48   | 0.56      | 0.52     | 0.35 |
| 1         | binary_erosion + binary_dilation + binary_opening + binary_closing | 0.48   | 0.56      | 0.52     | 0.35 |

|   |                                                                       |      |      |      |      |
|---|-----------------------------------------------------------------------|------|------|------|------|
| 1 | binary_dilation + binary_opening +<br>binary_closing + binary_erosion | 0.47 | 0.57 | 0.51 | 0.35 |
| 2 | opening                                                               | 0.50 | 0.56 | 0.53 | 0.36 |
| 2 | closing                                                               | 0.50 | 0.57 | 0.53 | 0.36 |
| 2 | erosion                                                               | 0.55 | 0.47 | 0.51 | 0.34 |
| 2 | dilation                                                              | 0.44 | 0.65 | 0.53 | 0.36 |
| 2 | binary_opening + binary_closing                                       | 0.50 | 0.56 | 0.53 | 0.36 |
| 2 | binary_opening + binary_erosion                                       | 0.55 | 0.47 | 0.51 | 0.34 |
| 2 | binary_opening + binary_dilation                                      | 0.45 | 0.63 | 0.53 | 0.36 |
| 2 | binary_closing + binary_opening                                       | 0.50 | 0.56 | 0.53 | 0.36 |
| 2 | binary_closing + binary_erosion                                       | 0.55 | 0.48 | 0.51 | 0.34 |
| 2 | binary_closing + binary_dilation                                      | 0.44 | 0.65 | 0.53 | 0.36 |
| 2 | binary_erosion + binary_opening                                       | 0.57 | 0.46 | 0.51 | 0.34 |
| 2 | binary_erosion + binary_closing                                       | 0.55 | 0.47 | 0.51 | 0.34 |
| 2 | binary_erosion + binary_dilation                                      | 0.50 | 0.56 | 0.53 | 0.36 |
| 2 | binary_dilation + binary_opening                                      | 0.57 | 0.46 | 0.51 | 0.34 |
| 2 | binary_dilation + binary_closing                                      | 0.55 | 0.47 | 0.51 | 0.34 |
| 2 | binary_dilation + binary_erosion                                      | 0.50 | 0.56 | 0.53 | 0.36 |
| 2 | binary_opening + binary_closing +<br>binary_dilation                  | 0.55 | 0.47 | 0.51 | 0.34 |
| 2 | binary_closing + binary_dilation +<br>binary_erosion                  | 0.50 | 0.56 | 0.53 | 0.36 |
| 2 | binary_dilation + binary_erosion +<br>binary_opening                  | 0.50 | 0.56 | 0.53 | 0.36 |
| 2 | binary_erosion + binary_opening +<br>binary_closing                   | 0.44 | 0.65 | 0.53 | 0.36 |
| 2 | binary_opening + binary_closing +<br>binary_erosion + binary_dilation | 0.50 | 0.56 | 0.53 | 0.36 |
| 2 | binary_closing + binary_erosion +<br>binary_dilation + binary_opening | 0.50 | 0.56 | 0.53 | 0.36 |
| 2 | binary_erosion + binary_dilation +<br>binary_opening + binary_closing | 0.50 | 0.56 | 0.53 | 0.36 |
| 2 | binary_dilation + binary_opening +<br>binary_closing + binary_erosion | 0.49 | 0.57 | 0.53 | 0.36 |
| 3 | opening                                                               | 0.57 | 0.62 | 0.59 | 0.42 |
| 3 | closing                                                               | 0.55 | 0.65 | 0.60 | 0.42 |
| 3 | erosion                                                               | 0.61 | 0.42 | 0.50 | 0.33 |

|   |                                                                    |      |      |      |      |
|---|--------------------------------------------------------------------|------|------|------|------|
| 3 | dilation                                                           | 0.48 | 0.81 | 0.60 | 0.43 |
| 3 | binary_opening + binary_closing                                    | 0.56 | 0.63 | 0.59 | 0.42 |
| 3 | binary_opening + binary_erosion                                    | 0.61 | 0.42 | 0.50 | 0.33 |
| 3 | binary_opening + binary_dilation                                   | 0.50 | 0.78 | 0.61 | 0.44 |
| 3 | binary_closing + binary_opening                                    | 0.56 | 0.63 | 0.59 | 0.42 |
| 3 | binary_closing + binary_erosion                                    | 0.61 | 0.43 | 0.50 | 0.34 |
| 3 | binary_closing + binary_dilation                                   | 0.48 | 0.81 | 0.60 | 0.43 |
| 3 | binary_erosion + binary_opening                                    | 0.64 | 0.37 | 0.47 | 0.31 |
| 3 | binary_erosion + binary_closing                                    | 0.61 | 0.42 | 0.50 | 0.33 |
| 3 | binary_erosion + binary_dilation                                   | 0.57 | 0.62 | 0.59 | 0.42 |
| 3 | binary_dilation + binary_opening                                   | 0.64 | 0.37 | 0.47 | 0.31 |
| 3 | binary_dilation + binary_closing                                   | 0.61 | 0.42 | 0.50 | 0.33 |
| 3 | binary_dilation + binary_erosion                                   | 0.57 | 0.62 | 0.59 | 0.42 |
| 3 | binary_opening + binary_closing + binary_dilation                  | 0.61 | 0.43 | 0.50 | 0.34 |
| 3 | binary_closing + binary_dilation + binary_erosion                  | 0.56 | 0.63 | 0.59 | 0.42 |
| 3 | binary_dilation + binary_erosion + binary_opening                  | 0.57 | 0.62 | 0.59 | 0.42 |
| 3 | binary_erosion + binary_opening + binary_closing                   | 0.48 | 0.81 | 0.60 | 0.43 |
| 3 | binary_opening + binary_closing + binary_erosion + binary_dilation | 0.56 | 0.63 | 0.59 | 0.42 |
| 3 | binary_closing + binary_erosion + binary_dilation + binary_opening | 0.56 | 0.63 | 0.59 | 0.42 |
| 3 | binary_erosion + binary_dilation + binary_opening + binary_closing | 0.56 | 0.63 | 0.59 | 0.42 |
| 3 | binary_dilation + binary_opening + binary_closing + binary_erosion | 0.55 | 0.65 | 0.60 | 0.43 |
